# Supplementary material for: Hierarchical magnetic core–shell nanoarchitectures: non-linker reagent synthetic route and applications in a biomolecule separation system
Source: Royal Society of Chemistry journal article supplement (doi:10.1039/c1jm14088d), 2011-12-23
Supplement: c1jm14088d.pdf [file c1jm14088d.pdf]

## Supporting information for:

# Hierarchical Magnetic Core-Shell Nanoarchitectures: Non-linker Reagent Synthetic Route and Applications in a Biomolecule Separation System

Zhen Liu,<sup>a,b</sup> Meng Li,<sup>a,b</sup> Fang Pu,<sup>a</sup> Jinsong Ren,<sup>\*,a</sup> Xinjian Yang,<sup>a,b</sup> and Xiaogang Qu<sup>a</sup>

<sup>a</sup> Laboratory of Chemical Biology and State Key laboratory of Rare Earth Resources Utilization ,  
Changchun Institute of Applied Chemistry, Chinese Academy of Sciences, Changchun, 130022  
(P. R. China).

<sup>b</sup> Graduate School of the Chinese Academy of Sciences, Beijing 100039 (P. R. China).

Fax: (+86) 0431-85262625; Tel: (+86) 0431-85262625

E-mail: jren@ciac.jl.cn; xqu@ciac.jl.cn

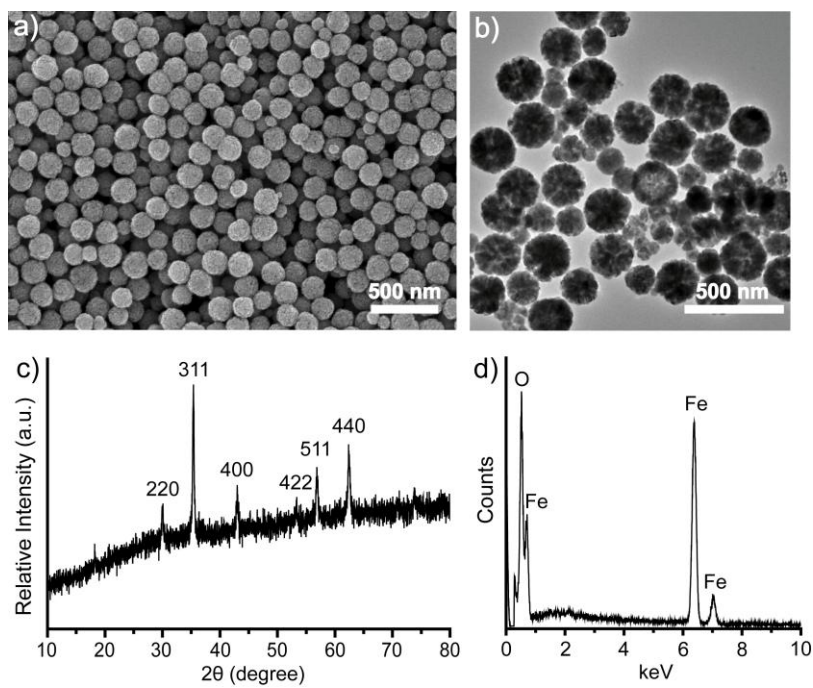

**Figure S1.** SEM image (a), TEM image (b), wide-angle XRD pattern (c) and EDS spectrum (d) of magnetic  $\text{Fe}_3\text{O}_4$  nanoparticles.

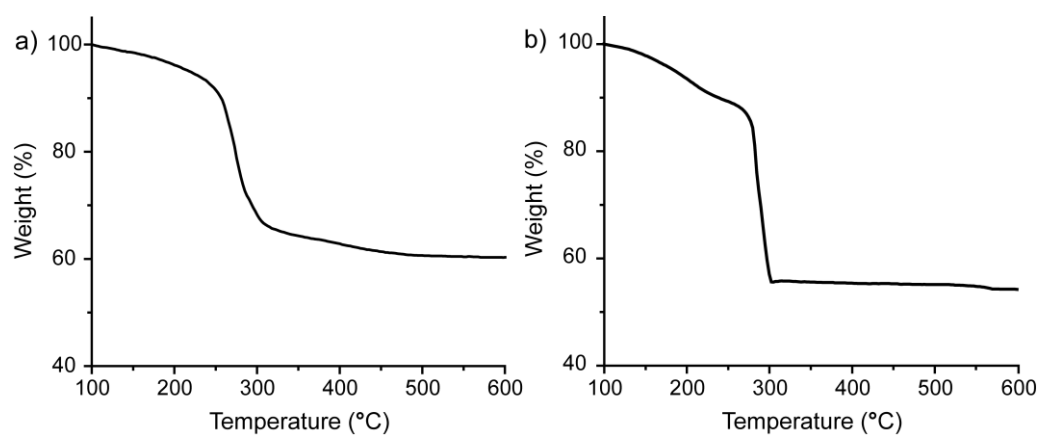

**Figure S2.** TGA curves of  $\alpha$ -Ni(OH)<sub>2</sub> (a) and amorphous Co(OH)<sub>2</sub> (b) synthesized through the same solvothermal method. The results present above were applied to confirm the calcining temperature and duration.

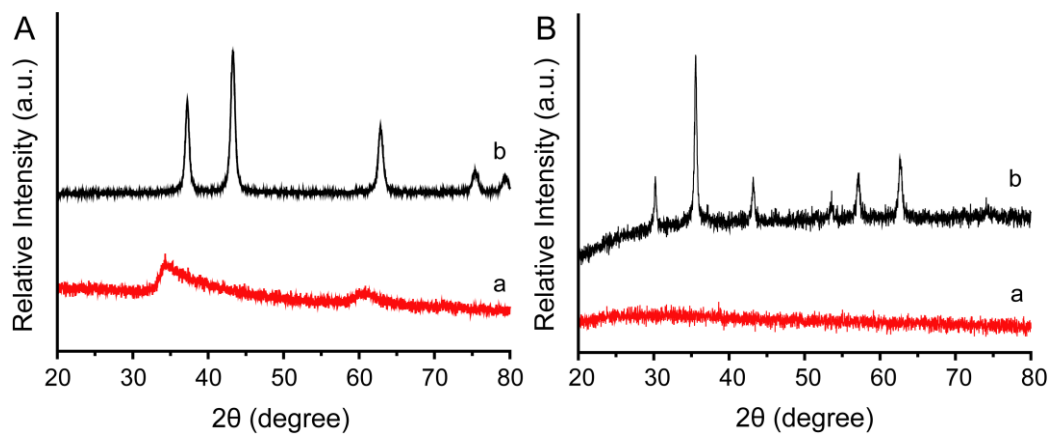

**Figure S3.** A: Wide-angle XRD patterns of  $\alpha$ -Ni(OH)<sub>2</sub> composite (a) and NiO coating materials(b). B: Wide-angle XRD patterns of amorphous Co(OH)<sub>2</sub> composite (a) and Co<sub>3</sub>O<sub>4</sub> coating materials (b). Control experiments were carried out to evidence the detailed components of the coating shells.

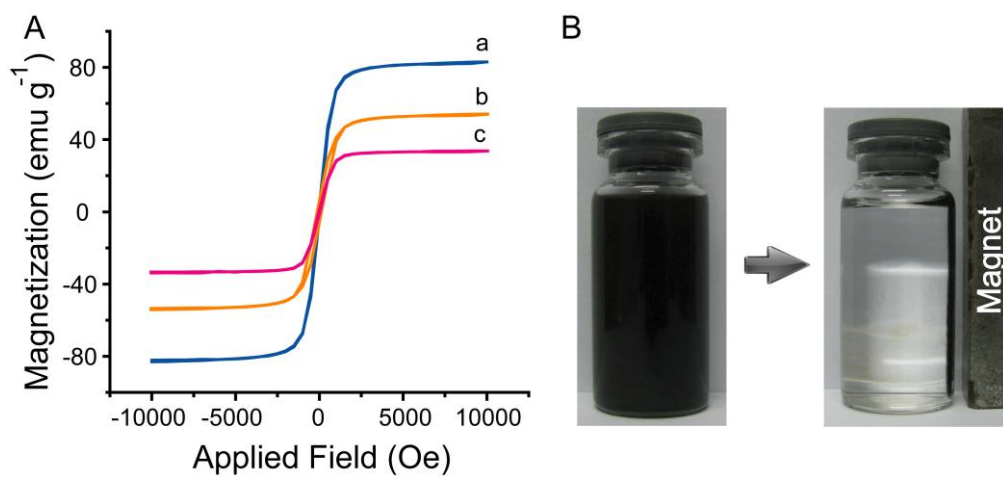

**Figure S4.** A: Room-temperature field-dependent magnetization curves of a) Fe<sub>3</sub>O<sub>4</sub>, b) Fe<sub>3</sub>O<sub>4</sub>@NiO, and c) Fe<sub>3</sub>O<sub>4</sub>@Co<sub>3</sub>O<sub>4</sub>. B: photograph shows the strong attraction of the as-prepared Fe<sub>3</sub>O<sub>4</sub>@NiO heteronanostructures suspended in water toward an assistant magnet.

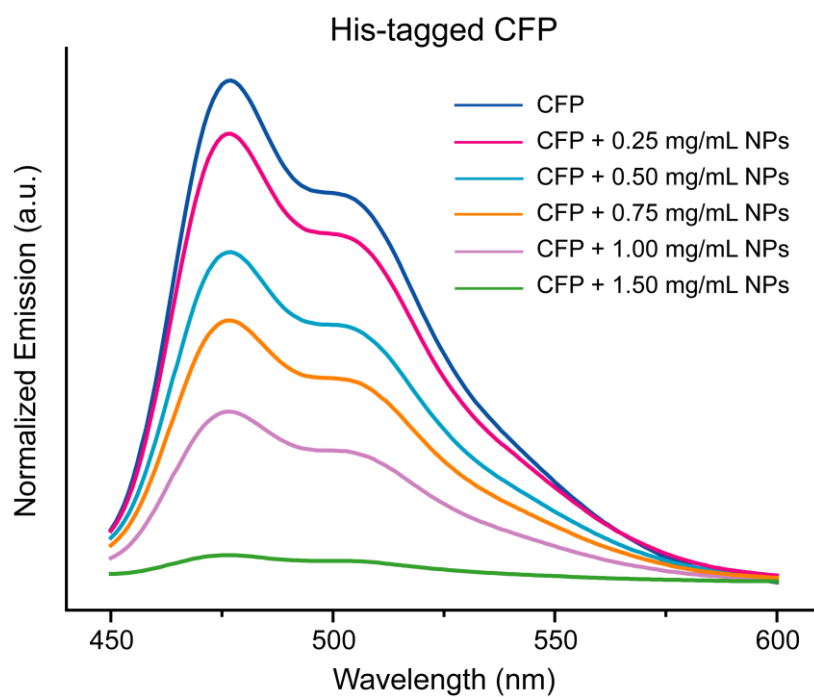

**Figure S5.** The fluorescence spectra corresponding to the change of emission intensity during the His-tagged CFP capturing experiments incubated with different concentrations of  $\text{Fe}_3\text{O}_4@\text{NiO}$  microspheres.

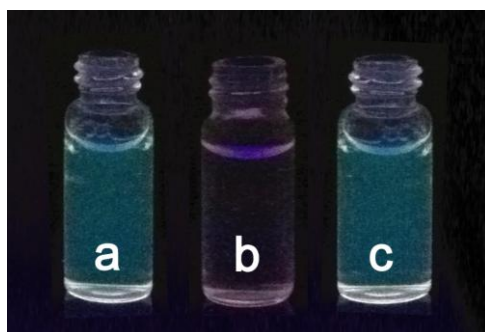

**Figure S6.** Fluorescent images from the solutions of His-tagged CFP (a) before and (b) after treatment with  $\text{Fe}_3\text{O}_4@\text{NiO}$  microspheres and (c) after treating protein-bound  $\text{Fe}_3\text{O}_4@\text{NiO}$  with imidazole solution (irradiation upon UV light).

| Cycle | Practical Fluorescent Percentage (%) | Normalized Fluorescent Percentage (%) |
|-------|--------------------------------------|---------------------------------------|
| 1     | 91.39                                | 100                                   |
| 2     | 90.93                                | 99.50                                 |
| 3     | 90.28                                | 98.79                                 |
| 4     | 89.11                                | 97.50                                 |
| 5     | 89.59                                | 98.03                                 |

**Table S1.** Detailed magnetic purification and recycling efficiency of Fe<sub>3</sub>O<sub>4</sub>@NiO microspheres for selective separation of His-tagged CFP from cell lysate. Normalized fluorescent percentages are calculated from practical fluorescent percentage by recognizing the value of the first cycle as 100%.
